# Supplementary material for: Simultaneous Lipid and Carotenoid Production via Rhodotorula paludigena CM33 Using Crude Glycerol as the Main Substrate: Pilot-Scale Experiments
Source: MDPI journal article supplement (doi:10.3390/ijms242417192), 2023-12-06
Supplement: s1 [file s1]

## Supplementary data

### Simultaneous Lipid and Carotenoids Production by *Rhodotorula paludigena* CM33 using Crude Glycerol as the Main Substrate: Pilot-Scale Experiments

Cheeranan Sriphuttha <sup>1</sup>, Pailin Boontawan <sup>1</sup>, Pasama Boonyanan <sup>3</sup>, Mariena Ketudat-Cairns <sup>1</sup> and Apichat Boontawan<sup>1,2,\*</sup>

<sup>1</sup> School of Biotechnology, Institute of Agricultural Technology, Suranaree University of Technology, 111 University Avenue, Muang district, Nakhon Ratchasima, THAILAND 30000

<sup>2</sup> Center of Excellent in Agricultural Product Innovation, Suranaree University of Technology, 111 University Avenue, Muang district, Nakhon Ratchasima, THAILAND 30000

<sup>3</sup> Technopolis, Suranaree University of Technology, 111 University avenue, Muang district, Nakhon Ratchasima, THAILAND 30000

\* Correspondence: apichat@sut.ac.th; Tel.: +66-44-224234

**Table S1.** The cultivation of yeast on different substrates was observed in terms of lipid, biomass, and carotenoid production.

| Strain                                                           | Substrate                                                | Operating conditions                                                                                                                                                                                  | Cultivation method | Lipid content | Carotenoids | Biomass   | Reference |
|------------------------------------------------------------------|----------------------------------------------------------|-------------------------------------------------------------------------------------------------------------------------------------------------------------------------------------------------------|--------------------|---------------|-------------|-----------|-----------|
| <i>R. paludigenum</i> DMKU3-LPK4                                 | 40 g/L glycerol                                          | Incubated in a shake flask at 30 °C, pH 6.0 and 130 rpm                                                                                                                                               | Batch              | -             | 3.42 mg/L   | 7.59 g/L  | [45]      |
| <i>R. toruloides</i> ATCC 10788                                  | 40 g/L pure glycerol                                     | Incubated in a shake flask at 30 °C, pH 6.0, 200 rpm, KH <sub>2</sub> PO <sub>4</sub> 1.0, Na <sub>2</sub> HPO <sub>4</sub> ·12H <sub>2</sub> O 1.0, MgCl <sub>2</sub> ·6H <sub>2</sub> O 1.5, pH 6.0 | Batch              | 53.28%        | -           | 21.16 g/L | [8]       |
| <i>T. spathulata</i> JU4-57                                      | 40% crude glycerol                                       | Incubated in a 5-L Stirred Tank at 30 °C, pH 6.0 and aeration rate at 1–3 vvm                                                                                                                         | Fed-batch          | 56.40%        | -           | 13.80 g/L | [46]      |
| <i>R. mucilaginosa</i> CCT 7688                                  | 70 g/L sugarcane molasses and 3.4 g/L corn steep liquor  | Incubated in a 250 mL Erlenmeyer flask at 25 °C and 180 rpm                                                                                                                                           | Batch              | -             | 1.25 mg/L   | 7.90 g/L  | [40]      |
| <i>R. mucilaginosa</i> CCT 7688                                  | 30 g/L sugarcane molasses and 6.5 g/L corn steep liquor  | Incubated in a 500 mL Erlenmeyer flask at 25 °C and 180 rpm                                                                                                                                           | Fed-batch          | -             | 3.73 mg/L   | 16 g/L    | [40]      |
| <i>R. glutinis</i> Rh-00301                                      | 400 g/L glycerol                                         | Incubated in 5 L bioreactors at 30 °C, pH 5.5 and aeration rate at 1 vvm                                                                                                                              | Fed-batch          | 63 ± 6%       | -           | 106 g/L   | [49]      |
| <i>R. glutinis</i> DBVPG 3853 and <i>D. castellii</i> DBVPG 3503 | 8.3 g/L glucose, 22.7 g/L maltose, and 4.65 g/L nitrogen | Incubated in 1 L bioreactors at 30 °C, and 220 rpm                                                                                                                                                    | Fed-batch          | -             | 8.20 mg/L   | -         | [50]      |
| <i>R. paludigena</i> CM33                                        | 40 g/L crude glycerol                                    | Incubated in a 500 L fermenter at 30 °C, pH 6.0 and flow level 0.7 vvm                                                                                                                                | Batch              | 40.99%        | 1.27 mg/g   | 9.27 g/L  | This work |
| <i>R. paludigena</i> CM33                                        | 40 g/L crude glycerol                                    | Incubated in a 500 L fermenter at 30 °C, pH 6.0 and flow level 0.7 vvm                                                                                                                                | Repeated batch     | 36.04%        | 14.64 mg/g  | 38.33 g/L | This work |
| <i>R. paludigena</i> CM33                                        | 40 g/L crude glycerol                                    | Incubated in a 500 L fermenter at 30 °C, pH 6.0 and flow level 0.7 vvm                                                                                                                                | Fed-batch          | 44.48%        | 15.39 mg/g  | 45.38 g/L | This work |

**Table S2.** Proximate compositions of *R. paludigena* CM33.

| Parameters                  | <i>R. paludigena</i> CM33 |
|-----------------------------|---------------------------|
|                             | Freeze-dried cells        |
| Moisture (g/100g)           | 10.71±0.07                |
| Protein (g/100g)            | 13.82±0.04                |
| Total fat (g/100g)          | 43.21±0.66                |
| Total carbohydrate (g/100g) | 30.93±0.95                |
| Ash (g/100g)                | 2.97±0.00                 |
| Crude fiber (g/100g)        | 0.21±0.02                 |
| Energy (Kcal/100g)          | 567.87±2.46               |
| Carotenoids (mg/g)          | 15.39±0.04                |
| β-carotene (mg/g)           | 10.16±0.08                |
| Torulene (mg/g)             | 3.25±0.01                 |
| Other                       | 0.86±0.00                 |

**Table S3.** Evaluated factors, factor notation, and their levels in Box-Behnken.

| Independent variables                                 | codes               | Factor levels |      |      |
|-------------------------------------------------------|---------------------|---------------|------|------|
|                                                       |                     | -1            | 0    | 1    |
| Crude glycerol (g/L)                                  | A (X <sub>1</sub> ) | 20            | 40   | 80   |
| Yeast extract (g/L)                                   | B (X <sub>2</sub> ) | 0.50          | 0.63 | 0.75 |
| (NH <sub>4</sub> ) <sub>2</sub> SO <sub>4</sub> (g/L) | C (X <sub>3</sub> ) | 0.25          | 0.40 | 0.55 |

**Table S4.** Box-Behnken designs consisting of 15 experiments for three experimental factors for the carotenoid concentration and lipid content by *R.paludigena* CM33.

| Run | Independent variables |                     |                                                       | Dependent variables             |           |                   |           |
|-----|-----------------------|---------------------|-------------------------------------------------------|---------------------------------|-----------|-------------------|-----------|
|     | Crude glycerol (g/L)  | Yeast extract (g/L) | (NH <sub>4</sub> ) <sub>2</sub> SO <sub>4</sub> (g/L) | Carotenoid concentration (ug/g) |           | Lipid content (%) |           |
|     |                       |                     |                                                       | observed                        | predicted | observed          | predicted |
| 1   | 20                    | 0.75                | 0.40                                                  | 206.00                          | 214.00    | 37.55             | 36.87     |
| 2   | 40                    | 0.50                | 0.25                                                  | 287.00                          | 295.45    | 38.37             | 37.84     |
| 3   | 40                    | 0.75                | 0.55                                                  | 332.00                          | 323.55    | 45.46             | 45.99     |
| 4   | 40                    | 0.63                | 0.40                                                  | 339.00                          | 328.00    | 42.55             | 42.44     |
| 5   | 40                    | 0.63                | 0.40                                                  | 319.00                          | 328.00    | 41.02             | 42.44     |
| 6   | 80                    | 0.63                | 0.25                                                  | 0                               | 0.37      | 0                 | -0.60     |
| 7   | 20                    | 0.63                | 0.55                                                  | 200.00                          | 203.26    | 30.94             | 30.92     |
| 8   | 40                    | 0.50                | 0.55                                                  | 298.00                          | 295.56    | 35.90             | 37.23     |
| 9   | 40                    | 0.63                | 0.40                                                  | 326.00                          | 328.00    | 43.76             | 42.44     |
| 10  | 80                    | 0.63                | 0.55                                                  | 0                               | 7.63      | 0                 | -1.84     |
| 11  | 80                    | 0.75                | 0.40                                                  | 0                               | -2.00     | 0                 | 1.49      |
| 12  | 80                    | 0.50                | 0.40                                                  | 0                               | -6.00     | 0                 | 0.95      |
| 13  | 40                    | 0.75                | 0.25                                                  | 317.00                          | 319.45    | 43.85             | 42.52     |
| 14  | 20                    | 0.50                | 0.40                                                  | 177.00                          | 177.00    | 28.82             | 27.07     |
| 15  | 20                    | 0.63                | 0.25                                                  | 215.00                          | 203.74    | 25.69             | 28.15     |

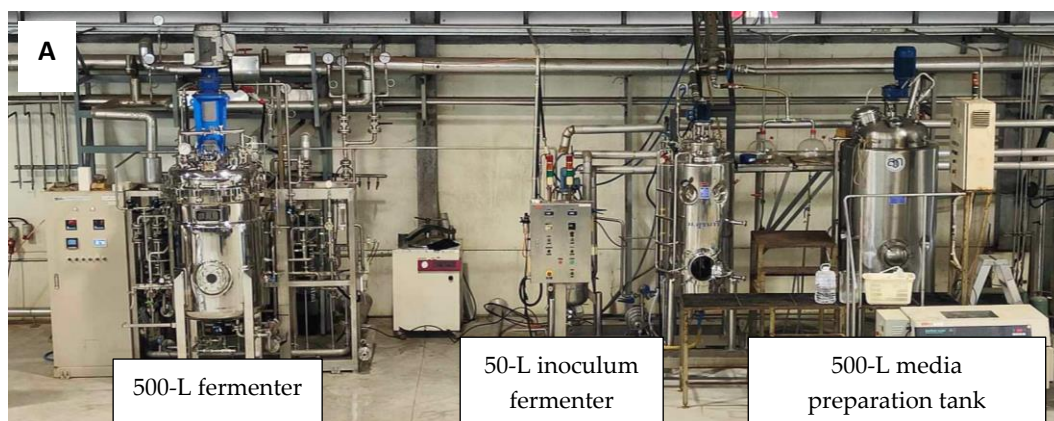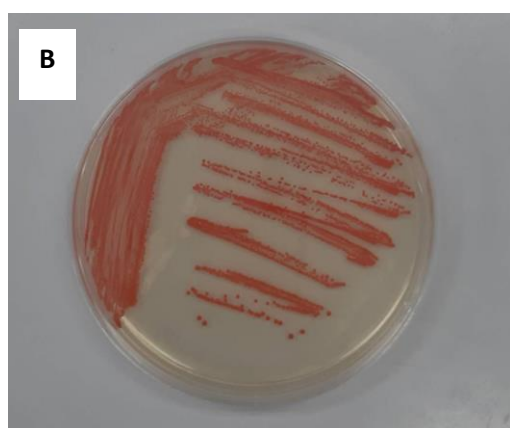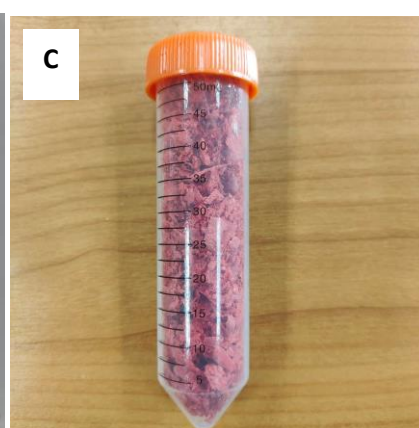

**Figure S1.** Experimental setup for the 500-L fermenter, 50-L inoculum fermenter, and 500-L media preparation tank (A), agar plate of *R. paludigena* CM33 (B), and the sample of lyophilized *R. paludigena* CM33 after freeze drying (C).
